# Supplementary material for: Synthesis and characterization of diamonds using C3H5N3O as an organic additive under high pressure and high temperature
Source: Royal Society of Chemistry journal article supplement (doi:10.1039/c8ce00912k), 2018-01-01
Supplement: c8ce00912k1.xlsx [file c8ce00912k1.xlsx]

## Sheet: raman data.excel
#Wave	#Intensity
2124.48	98.0771
2122.97	106.834
2121.46	99.8088
2119.96	84.0329
2118.45	92.768
2116.94	89.2496
2115.43	104.979
2113.92	110.206
2112.41	97.9414
2110.9	90.9276
2109.39	78.6717
2107.88	97.8832
2106.37	99.6114
2104.86	80.3722
2103.35	92.5843
2101.84	97.8055
2100.32	76.8319
2098.81	89.0375
2097.3	82.0379
2095.79	90.7473
2094.27	97.7084
2092.76	94.2001
2091.25	92.4372
2089.73	90.6751
2088.22	109.834
2086.7	88.8959
2085.19	88.8782
2083.67	92.3452
2082.16	83.6167
2080.64	76.6333
2079.12	90.5486
2077.61	88.7895
2076.09	74.8468
2074.58	97.4554
2073.06	95.696
2071.54	86.979
2070.02	86.9616
2068.5	79.9886
2066.99	86.9268
2065.47	86.9094
2063.95	92.1055
2062.43	90.3495
2060.91	93.8057
2059.39	85.1029
2057.87	83.3494
2056.35	92.0132
2054.83	97.2019
2053.31	91.9762
2051.79	85.0175
2050.26	69.3881
2048.74	91.9208
2047.22	84.9663
2045.7	81.4818
2044.17	72.7989
2042.65	77.9831
2041.12	81.4326
2039.6	88.3453
2038.08	84.8637
2036.55	88.3097
2035.03	88.2919
2033.5	91.7358
2031.98	84.7952
2030.45	91.6988
2028.92	93.41
2027.4	86.4733
2025.87	89.9141
2024.34	86.4384
2022.82	72.5935
2021.29	84.6753
2019.76	79.475
2018.23	79.459
2016.7	79.4429
2015.17	84.6068
2013.64	74.2317
2012.12	93.2023
2010.59	81.1041
2009.05	79.3624
2007.53	86.246
2005.99	77.6056
2004.46	84.4867
2002.93	82.7457
2001.4	81.0054
1999.87	87.8816
1998.34	72.3584
1996.8	82.6784
1995.27	74.051
1993.74	79.2013
1992.2	77.4637
1990.67	84.3322
1989.13	86.0358
1987.6	82.5775
1986.06	75.6806
1984.53	82.5438
1982.99	82.527
1981.46	77.3533
1979.92	61.87
1978.39	77.3217
1976.85	75.588
1975.31	73.855
1973.78	77.2743
1972.24	56.6562
1970.7	68.6602
1969.16	66.93
1967.62	80.6427
1966.08	61.7562
1964.54	78.8946
1963	72.0194
1961.46	85.7199
1959.92	68.5618
1958.38	71.9752
1956.84	80.5271
1955.3	80.5106
1953.76	70.2182
1952.22	73.6284
1950.68	68.4775
1949.13	78.7329
1947.59	73.583
1946.05	75.2788
1944.5	61.5791
1942.96	68.4071
1941.42	73.5225
1939.87	68.379
1938.33	68.3649
1936.78	63.2245
1935.24	68.3367
1933.69	83.6952
1932.15	75.1394
1930.6	73.4166
1929.05	68.2804
1927.51	69.973
1925.96	69.9585
1924.41	64.8262
1922.86	73.3408
1921.32	80.1467
1919.77	76.7203
1918.22	76.7045
1916.67	76.6886
1915.12	76.6728
1913.57	73.2499
1912.02	74.9379
1910.47	76.6252
1908.92	66.3947
1907.37	74.8914
1905.82	85.0862
1904.27	78.2631
1902.71	78.2468
1901.16	57.8226
1899.61	64.6119
1898.05	69.6984
1896.5	50.9882
1894.95	66.2709
1893.39	64.5583
1891.84	71.339
1890.29	69.626
1888.73	76.4029
1887.18	67.8996
1885.62	67.8855
1884.06	83.1424
1882.51	76.3394
1880.95	71.2352
1879.39	67.829
1877.84	59.338
1876.28	66.1057
1874.72	72.8706
1873.16	66.0781
1871.61	79.616
1870.05	71.1314
1868.49	76.1963
1866.93	74.4875
1865.37	86.3197
1863.81	64.3032
1862.25	77.8245
1860.69	60.8934
1859.12	82.8654
1857.56	65.9403
1856	64.2361
1854.44	77.7432
1852.88	64.2092
1851.31	65.8851
1849.75	76.0054
1848.19	60.7916
1846.62	77.6618
1845.06	64.142
1843.5	67.5037
1841.93	67.4896
1840.37	62.4148
1838.8	65.7747
1837.24	74.1918
1835.67	69.1188
1834.1	64.0479
1832.54	67.4046
1830.97	77.499
1829.4	67.3763
1827.83	72.4143
1826.27	69.0317
1824.7	62.2838
1823.13	70.6856
1821.56	67.3055
1819.99	70.6559
1818.42	62.2314
1816.85	57.1735
1815.28	65.5676
1813.71	75.639
1812.14	65.54
1810.57	75.6071
1809	70.5517
1807.43	65.4985
1805.85	67.1638
1804.28	68.8284
1802.71	65.4571
1801.13	57.0531
1799.56	68.7848
1797.99	58.7063
1796.41	63.7248
1794.84	60.3581
1793.26	67.0504
1791.69	68.7121
1790.11	61.9954
1788.54	75.3838
1786.96	60.2943
1785.38	65.305
1783.81	60.2688
1782.23	63.6035
1780.65	66.9369
1779.07	68.5958
1777.5	80.2902
1775.92	60.2049
1774.34	66.8802
1772.76	61.851
1771.18	55.1527
1769.6	75.1923
1768.02	68.494
1766.44	63.4687
1764.86	66.795
1763.28	66.7808
1761.69	65.0975
1760.11	56.7396
1758.53	81.7543
1756.95	61.7197
1755.36	66.7098
1753.78	73.3652
1752.2	61.6803
1750.61	60.0005
1749.03	73.3184
1747.44	68.3048
1745.86	61.6278
1744.27	69.941
1742.69	63.2664
1741.1	66.5821
1739.52	69.8962
1737.93	59.8983
1736.34	76.5204
1734.75	63.199
1733.17	58.1972
1731.58	59.8471
1729.99	53.1861
1728.4	71.4536
1726.81	61.4701
1725.22	63.118
1723.63	64.7652
1722.04	61.4307
1720.45	69.7173
1718.86	59.7449
1717.27	63.0505
1715.68	71.3314
1714.09	56.3895
1712.5	56.3774
1710.9	54.7075
1709.31	51.3809
1707.72	59.6553
1706.12	56.3291
1704.53	53.0042
1702.94	59.617
1701.34	57.9485
1699.75	59.5914
1698.15	66.1984
1696.56	43.0197
1694.96	51.2818
1693.36	62.848
1691.77	56.2203
1690.17	46.2892
1688.57	56.1962
1686.97	44.6168
1685.38	61.1284
1683.78	71.0258
1682.18	62.7535
1680.58	67.6931
1678.98	66.0279
1677.38	62.713
1675.78	57.7495
1674.18	65.9852
1672.58	61.0232
1670.98	41.223
1669.38	56.0512
1667.78	64.2801
1666.18	69.2098
1664.57	60.9574
1662.97	60.9443
1661.37	55.9907
1659.76	62.5644
1658.16	54.3205
1656.55	49.3716
1654.95	49.3609
1653.35	47.7053
1651.74	57.5629
1650.13	72.3491
1648.53	59.1819
1646.92	59.1691
1645.32	72.3022
1643.71	55.8578
1642.1	55.8457
1640.49	62.4023
1638.89	54.1797
1637.28	59.0923
1635.67	54.1563
1634.06	57.426
1632.45	57.4136
1630.84	63.9612
1629.23	50.83
1627.62	57.3762
1626.01	62.2807
1624.4	57.3513
1622.79	57.3389
1621.18	58.9644
1619.56	54.0389
1617.95	55.6644
1616.34	50.7418
1614.72	47.4578
1613.11	63.8087
1611.5	47.4372
1609.88	57.2393
1608.27	52.3217
1606.65	55.5798
1605.04	55.5677
1603.42	50.6536
1601.81	47.3753
1600.19	55.5314
1598.57	45.7218
1596.96	47.3444
1595.34	52.2307
1593.72	47.3238
1592.1	52.208
1590.48	50.5654
1588.87	44.0313
1587.25	48.913
1585.63	60.3129
1584.01	52.1511
1582.39	47.2516
1580.77	50.4993
1579.14	47.231
1577.52	65.132
1575.9	56.978
1574.28	45.5725
1572.66	42.3081
1571.04	47.1794
1569.41	55.3017
1567.79	65.0467
1566.16	55.2776
1564.54	47.1382
1562.92	45.5028
1561.29	55.2413
1559.67	60.1024
1558.04	55.2171
1556.41	50.334
1554.79	56.8163
1553.16	58.4268
1551.54	48.6784
1549.91	45.4232
1548.28	50.2789
1546.65	56.7541
1545.02	55.1205
1543.39	58.3501
1541.77	51.8554
1540.13	51.844
1538.51	45.3535
1536.88	37.2465
1535.24	53.4289
1533.61	58.2733
1531.98	43.6954
1530.35	50.1578
1528.72	42.0586
1527.09	51.753
1525.45	54.9755
1523.82	58.1966
1522.19	45.254
1520.55	50.0917
1518.92	53.3117
1517.29	53.2999
1515.65	48.4438
1514.02	46.8187
1512.38	64.5634
1510.74	64.5492
1509.11	43.5611
1507.47	41.9385
1505.83	62.8939
1504.2	49.9815
1502.56	51.5825
1500.92	56.4059
1499.28	53.171
1497.64	61.2137
1496	62.8108
1494.36	43.4748
1492.72	59.5634
1491.08	54.7219
1489.44	51.4916
1487.8	65.959
1486.16	56.2941
1484.52	62.7138
1482.88	54.6615
1481.23	56.2568
1479.59	51.4234
1477.95	49.8054
1476.3	46.5819
1474.66	67.4485
1473.02	49.7724
1471.37	56.1822
1469.73	52.9601
1468.08	52.9484
1466.44	56.145
1464.79	51.3212
1463.14	51.3098
1461.5	59.3139
1459.85	64.1089
1458.2	56.0829
1456.55	56.0704
1454.9	59.2613
1453.26	54.4443
1451.61	64.0379
1449.96	68.8255
1448.31	52.8079
1446.66	57.5958
1445.01	59.1826
1443.36	57.5703
1441.71	60.7552
1440.05	60.7417
1438.4	60.7282
1436.75	63.9102
1435.1	65.4935
1433.44	68.673
1431.79	59.0776
1430.14	65.4498
1428.48	65.4353
1426.83	74.9945
1425.17	63.811
1423.52	68.5815
1421.86	58.9989
1420.21	58.9858
1418.55	60.5665
1416.89	68.5206
1415.24	70.0985
1413.58	73.2685
1411.92	60.5127
1410.26	63.6833
1408.6	65.2609
1406.95	73.2032
1405.29	68.4139
1403.63	60.4453
1401.97	58.8415
1400.31	66.7782
1398.64	58.8153
1396.98	50.856
1395.32	52.4335
1393.66	66.7187
1392	69.8802
1390.34	61.9255
1388.67	71.4365
1387.01	73.0077
1385.35	71.4047
1383.68	71.3887
1382.02	60.2704
1380.35	60.2569
1378.69	58.6581
1377.02	52.305
1375.36	63.3858
1373.69	85.5518
1372.02	64.9415
1370.36	74.4285
1368.69	69.6621
1367.02	80.7267
1365.35	71.2135
1363.68	87.0193
1362.01	75.9271
1360.34	88.5618
1358.67	98.0287
1357	101.168
1355.33	116.95
1353.66	137.464
1351.99	151.65
1350.32	168.989
1348.65	217.9
1346.98	244.688
1345.3	293.56
1343.63	405.527
1341.96	509.555
1340.28	701.862
1338.61	1140.07
1336.93	2531.88
1335.26	8780.77
1333.58	19881.9
1331.91	25011.9
1330.23	13566.3
1328.56	4500.62
1326.88	1774.34
1325.2	963.311
1323.52	651.505
1321.85	456.266
1320.17	380.661
1318.49	298.799
1316.81	253.136
1315.13	196.49
1313.45	172.872
1311.77	141.409
1310.09	120.956
1308.41	113.076
1306.73	89.4987
1305.04	91.0484
1303.36	86.3196
1301.68	87.8692
1300	86.2807
1298.31	81.5562
1296.63	65.8575
1294.95	64.275
1293.26	67.3952
1291.58	75.2149
1289.89	59.5317
1288.21	57.952
1286.52	64.2027
1284.84	54.7948
1283.15	62.6085
1281.46	56.335
1279.77	53.1933
1278.09	56.3096
1276.4	40.6589
1274.71	54.7208
1273.02	48.456
1271.33	51.5706
1269.64	42.1846
1267.95	43.7371
1266.26	45.289
1264.57	49.9627
1262.88	39.0246
1261.19	35.8945
1259.5	43.6878
1257.8	54.5974
1256.11	54.5851
1254.42	42.099
1252.72	49.8838
1251.03	48.3141
1249.34	45.1868
1247.64	46.7344
1245.95	42.0515
1244.25	32.6993
1242.55	34.2487
1240.86	37.3537
1239.16	42.0135
1237.46	40.4483
1235.77	35.7731
1234.07	34.21
1232.37	37.3115
1230.67	32.6402
1228.97	34.1867
1227.27	34.179
1225.57	35.7245
1223.88	34.1635
1222.17	35.7083
1220.47	32.5959
1218.77	45.0032
1217.07	37.2356
1215.37	37.2271
1213.67	37.2187
1211.96	35.6598
1210.26	32.5516
1208.56	30.9945
1206.85	35.6356
1205.15	38.7256
1203.44	35.6194
1201.74	34.063
1200.03	35.6033
1198.33	32.5
1196.62	26.3035
1194.91	37.126
1193.21	37.1175
1191.5	37.1091
1189.79	41.7383
1188.08	37.0923
1186.38	30.9032
1184.67	33.9858
1182.96	35.5226
1181.25	37.0586
1179.54	27.7876
1177.83	23.1511
1176.12	37.0333
1174.4	37.0249
1172.69	29.3047
1170.98	33.9241
1169.27	26.2081
1167.56	35.45
1165.84	32.36
1164.13	36.9744
1162.41	30.805
1160.7	24.6384
1158.99	32.3306
1157.27	32.3232
1155.55	32.3158
1153.84	32.3085
1152.12	29.2248
1150.41	30.756
1148.69	27.6741
1146.97	32.2791
1145.25	30.735
1143.54	29.1916
1141.82	35.3291
1140.1	33.7854
1138.38	36.8484
1136.66	26.095
1134.94	32.2276
1133.22	26.0831
1131.5	29.145
1129.78	32.2056
1128.05	30.665
1126.33	30.658
1124.61	29.1185
1122.88	27.5796
1121.16	33.7007
1119.44	29.0985
1117.71	29.0919
1115.99	26.0236
1114.26	30.6091
1112.54	32.1322
1110.81	21.4166
1109.09	21.4117
1107.36	29.0521
1105.63	29.0454
1103.91	27.5104
1102.18	27.5042
1100.45	32.0808
1098.72	30.5462
1096.99	30.5392
1095.26	27.479
1093.53	24.4202
1091.8	22.8887
1090.07	25.9346
1088.34	22.8782
1086.61	21.3481
1084.88	25.9168
1083.15	32.0076
1081.41	25.905
1079.68	27.4225
1077.95	28.9394
1076.21	22.8416
1074.48	22.8364
1072.75	25.8753
1071.01	19.7825
1069.28	24.3421
1067.54	15.2103
1065.8	34.9758
1064.07	31.9271
1062.33	30.3998
1060.59	25.8339
1058.86	24.3087
1057.12	22.7842
1055.38	31.8905
1053.64	27.3285
1051.9	19.7327
1050.16	27.3159
1048.42	27.3097
1046.68	21.236
1044.94	27.2971
1043.2	30.3232
1041.46	30.3163
1039.71	21.2165
1037.97	16.6663
1036.23	25.7511
1034.49	33.3173
1032.74	25.7393
1031	22.7059
1029.25	25.7274
1027.51	30.2606
1025.77	28.741
1024.02	16.6357
1022.27	18.1439
1020.53	24.1863
1018.78	18.1355
1017.03	22.6642
1015.29	24.1696
1013.54	28.6948
1011.79	27.1783
1010.04	21.1338
1008.29	28.675
1006.54	21.1241
1004.79	22.6278
1003.04	18.0981
1001.29	30.1565
999.537	21.1047
997.787	22.607
996.033	22.6018
994.281	25.6095
992.529	25.6036
990.775	18.0689
989.021	30.108
987.268	28.596
985.514	31.5988
983.758	24.0698
982.004	28.5763
980.248	22.555
978.49	28.5631
976.734	21.0416
974.979	19.5342
973.221	21.032
971.463	25.5329
969.705	24.0254
967.945	25.5212
966.188	22.5135
964.428	22.5083
962.668	16.5023
960.908	20.9981
959.146	25.4918
957.387	23.9867
955.625	22.4824
953.863	25.4741
952.102	26.9664
950.338	16.4757
948.576	16.4719
946.812	19.4623
945.049	22.4513
943.283	29.9281
941.52	25.433
939.754	17.9486
937.988	22.4305
936.223	19.4353
934.457	16.4415
932.689	23.9094
930.922	28.3858
929.156	23.8983
927.387	26.8794
925.619	19.4084
923.85	28.3596
922.082	17.9072
920.312	20.8869
918.541	28.3399
916.771	23.8597
915	20.8724
913.23	22.3581
911.457	17.8824
909.686	19.3681
907.914	23.8321
906.141	22.3375
904.367	20.8435
902.594	20.8387
900.82	20.8338
899.045	28.268
897.271	29.7489
895.496	22.3065
893.719	22.3013
891.943	22.2962
890.168	23.7771
888.391	23.7716
886.613	17.8246
884.836	31.1857
883.057	23.7551
881.279	19.2965
879.5	19.2921
877.721	22.2549
875.939	19.2831
874.16	26.6935
872.379	23.7221
870.598	25.1989
868.816	20.7472
867.035	28.1504
865.252	26.6626
863.471	20.7328
861.688	26.6503
859.904	25.1639
858.119	23.6782
856.336	28.1113
854.551	22.188
852.766	20.704
850.98	22.1777
849.193	19.2162
847.408	17.7339
845.621	19.2073
843.834	20.68
842.045	28.0592
840.258	26.5762
838.469	20.6656
836.68	20.6608
834.891	23.6069
833.102	20.6512
831.311	23.5959
829.521	14.744
827.73	17.6887
825.938	25.0532
824.146	25.0474
822.354	20.6225
820.561	26.5085
818.768	25.0299
816.975	27.9681
815.182	29.4333
813.387	17.6559
811.592	19.1228
809.797	20.589
808.002	24.9951
806.205	19.1094
804.408	26.4531
802.611	27.9162
800.814	19.0961
799.018	22.0289
797.219	19.0873
795.42	17.6149
793.621	27.8838
791.822	22.0084
790.023	20.5364
788.223	26.3978
786.422	21.993
784.621	24.9197
782.82	29.3104
781.018	21.9777
779.215	24.9023
777.412	16.1095
775.609	16.1057
773.807	20.4934
772.002	21.9521
770.197	17.5576
768.393	11.7024
766.588	21.9368
764.783	21.9317
762.977	19.0031
761.17	24.8444
759.363	23.3775
757.557	24.8328
755.748	20.4458
753.939	16.0608
752.131	26.2752
750.322	20.4315
748.514	20.4267
746.703	17.5046
744.893	23.334
743.082	27.7026
741.271	29.1539
739.459	21.8603
737.648	20.3982
735.836	13.1101
734.023	18.9324
732.209	18.9279
730.396	14.5566
728.582	14.5532
726.768	17.4597
724.953	21.8196
723.137	23.2688
721.322	20.3554
719.506	24.7116
717.689	24.7058
715.871	21.7941
714.055	23.2417
712.236	17.4272
710.418	20.327
708.6	24.677
706.781	17.415
704.961	15.96
703.141	23.2091
701.32	18.853
699.5	17.3987
697.678	20.2938
695.857	23.1875
694.035	18.8354
692.213	24.6252
690.389	15.9302
688.566	14.4786
686.742	21.7129
684.918	15.9191
683.094	20.2559
681.268	23.1442
679.443	17.3541
677.617	17.35
675.791	17.346
673.963	27.458
672.137	24.562
670.309	21.6673
668.48	17.3298
666.652	11.5505
664.824	14.4347
662.994	14.4314
661.164	21.642
659.334	20.1944
657.504	17.3055
655.672	18.7432
653.84	17.2974
652.01	23.0578
650.176	21.6116
648.344	24.4874
646.51	23.0416
644.678	20.1567
642.844	20.152
641.008	18.7082
639.174	25.8976
637.338	12.9458
635.502	21.5712
633.666	18.6907
631.83	17.2489
629.992	22.9931
628.154	21.551
626.316	17.2368
624.479	12.9246
622.641	18.6644
620.801	20.0954
618.961	15.7856
617.121	20.086
615.279	14.3438
613.439	17.2085
611.598	20.0719
609.756	15.7671
607.914	20.0625
606.07	12.8943
604.229	21.4855
602.385	17.1844
600.541	20.0437
598.695	17.1763
596.852	17.1723
595.006	14.3069
593.16	21.4553
591.314	15.7302
589.467	20.0156
587.621	21.4402
585.773	21.4352
583.926	17.1441
582.076	18.5685
580.229	14.2801
578.379	18.5597
576.529	17.1281
574.68	11.416
572.83	15.6934
570.979	21.395
569.127	15.686
567.275	19.9593
565.424	17.104
563.57	15.675
561.717	25.6439
559.863	15.6676
558.01	17.0879
556.156	14.2366
554.301	14.2332
552.445	15.6529
550.59	14.2266
548.734	17.0679
546.877	14.2199
545.02	17.0599
543.162	19.8985
541.305	19.8938
539.447	12.7859
537.588	15.6235
535.729	17.0398
533.869	15.6162
532.01	7.0966
530.148	22.7038
528.287	15.6052
526.426	14.1832
524.564	17.0158
522.701	18.4295
520.84	17.0078
518.977	19.8378
517.113	12.7499
515.248	16.9959
513.385	12.7439
511.52	12.7409
509.654	14.1532
507.789	16.9799
505.922	14.1466
504.055	9.90028
502.189	16.9679
500.32	16.9639
498.453	9.89329
496.584	12.717
494.717	24.0153
492.848	16.948
490.977	11.296
489.107	12.705
487.236	14.1133
485.365	15.521
483.494	18.3387
481.621	14.1034
479.75	12.6901
477.877	23.9645
476.004	9.86541
474.131	16.9081
472.256	18.3128
470.381	16.9002
468.506	16.8962
466.631	11.2615
464.756	12.6662
462.879	16.8843
461.002	11.2535
459.125	14.0636
457.248	12.6543
455.369	11.2456
453.49	14.0537
451.611	16.8604
449.732	15.4518
447.852	14.0438
445.973	11.2324
444.092	15.4408
442.211	15.4372
440.328	12.6275
438.447	12.6245
436.564	8.41435
434.682	19.6289
432.799	16.8208
430.914	11.2112
429.029	14.0107
427.145	12.6067
425.26	12.6037
423.375	12.6007
421.488	13.9975
419.602	13.9942
417.715	19.5873
415.828	8.39256
