# Supplementary material for: Synthesis and characterization of diamonds using C3H5N3O as an organic additive under high pressure and high temperature
Source: Royal Society of Chemistry journal article supplement (doi:10.1039/c8ce00912k), 2018-01-01
Supplement: c8ce00912k2.xlsx [file c8ce00912k2.xlsx]

## Sheet: raman data.excel
#Wave	#Intensity
2124.48	120.845
2122.97	127.851
2121.46	131.327
2119.96	126.049
2118.45	117.273
2116.94	132.999
2115.43	125.975
2113.92	111.955
2112.41	124.176
2110.9	132.894
2109.39	120.63
2107.88	113.614
2106.37	111.844
2104.86	94.3499
2103.35	106.559
2101.84	108.285
2100.32	92.5476
2098.81	120.463
2097.3	130.912
2095.79	111.689
2094.27	106.432
2092.76	118.622
2091.25	123.831
2089.73	106.369
2088.22	108.091
2086.7	99.3542
2085.19	134.189
2083.67	116.738
2082.16	121.941
2080.64	107.983
2079.12	121.892
2077.61	121.868
2076.09	114.881
2074.58	121.819
2073.06	109.615
2071.54	120.031
2070.02	116.529
2068.5	102.594
2066.99	118.22
2065.47	99.0767
2063.95	109.484
2062.43	111.199
2060.91	104.229
2059.39	112.892
2057.87	112.869
2056.35	97.2214
2054.83	111.088
2053.31	112.801
2051.79	116.248
2050.26	109.286
2048.74	109.264
2047.22	107.508
2045.7	124.823
2044.17	117.865
2042.65	116.108
2041.12	107.422
2039.6	119.526
2038.08	121.234
2036.55	119.478
2035.03	103.873
2033.5	124.622
2031.98	100.37
2030.45	98.6194
2028.92	88.2206
2027.4	100.309
2025.87	108.934
2024.34	105.455
2022.82	98.5198
2021.29	101.956
2019.76	117.485
2018.23	110.552
2016.7	100.167
2015.17	89.7868
2013.64	108.758
2012.12	103.558
2010.59	117.342
2009.05	100.066
2007.53	108.67
2005.99	108.648
2004.46	110.35
2002.93	106.88
2001.4	103.411
1999.87	103.39
1998.34	98.2006
1996.8	96.4582
1995.27	101.605
1993.74	123.967
1992.2	108.449
1990.67	111.869
1989.13	106.684
1987.6	99.7811
1986.06	118.681
1984.53	113.498
1982.99	98.0008
1981.46	101.419
1979.92	99.6794
1978.39	103.096
1976.85	103.075
1975.31	104.771
1973.78	104.75
1972.24	120.18
1970.7	92.6912
1969.16	106.402
1967.62	104.664
1966.08	94.3498
1964.54	97.7607
1963	104.6
1961.46	108.007
1959.92	101.129
1958.38	95.9669
1956.84	107.941
1955.3	92.5015
1953.76	89.0573
1952.22	97.6004
1950.68	95.8684
1949.13	99.2719
1947.59	97.5403
1946.05	100.942
1944.5	85.5265
1942.96	102.611
1941.42	92.3306
1939.87	94.0211
1938.33	105.966
1936.78	99.1087
1935.24	97.3798
1933.69	87.1114
1932.15	97.3397
1930.6	85.3681
1929.05	92.1785
1927.51	88.7462
1925.96	97.2594
1924.41	92.1215
1922.86	97.2193
1921.32	92.0834
1919.77	103.999
1918.22	80.1136
1916.67	86.9138
1915.12	110.75
1913.57	102.209
1912.02	86.8598
1910.47	93.653
1908.92	78.3117
1907.37	97.0184
1905.82	100.402
1904.27	93.5754
1902.71	86.7519
1901.16	105.441
1899.61	105.419
1898.05	98.5977
1896.5	93.4784
1894.95	112.151
1893.39	93.4396
1891.84	103.611
1890.29	105.288
1888.73	96.777
1887.18	100.152
1885.62	88.2511
1884.06	100.11
1882.51	89.9108
1880.95	101.765
1879.39	91.5691
1877.84	101.722
1876.28	101.701
1874.72	98.2905
1873.16	76.244
1871.61	105.025
1870.05	103.31
1868.49	101.595
1866.93	101.574
1865.37	103.245
1863.81	96.4549
1862.25	93.051
1860.69	98.106
1859.12	108.232
1857.56	91.3019
1856	87.902
1854.44	84.5035
1852.88	99.6932
1851.31	94.6043
1849.75	92.8954
1848.19	103.008
1846.62	97.9214
1845.06	101.277
1843.5	104.631
1841.93	91.1109
1840.37	107.961
1838.8	89.3862
1837.24	79.2504
1835.67	94.4061
1834.1	112.926
1832.54	111.218
1830.97	99.4009
1829.4	90.958
1827.83	94.307
1826.27	101.022
1824.7	107.734
1823.13	89.1985
1821.56	92.5451
1819.99	85.7964
1818.42	89.1422
1816.85	82.3972
1815.28	90.7859
1813.71	92.4477
1812.14	109.233
1810.57	90.7285
1809	77.271
1807.43	102.446
1805.85	83.9547
1804.28	92.3307
1802.71	99.0248
1801.13	97.3258
1799.56	82.2062
1797.99	100.639
1796.41	95.5872
1794.84	107.303
1793.26	113.986
1791.69	103.906
1790.11	103.884
1788.54	107.213
1786.96	95.466
1785.38	103.818
1783.81	107.144
1782.23	92.0578
1780.65	80.3243
1779.07	83.6534
1777.5	97.0174
1775.92	102.014
1774.34	88.6162
1772.76	81.9108
1771.18	81.8934
1769.6	86.8889
1768.02	90.2116
1766.44	95.2031
1764.86	106.872
1763.28	98.5017
1761.69	88.4658
1760.11	101.797
1758.53	91.7651
1756.95	103.422
1755.36	85.055
1753.78	85.0369
1752.2	95.0211
1750.61	88.3341
1749.03	88.3153
1747.44	89.9624
1745.86	84.9464
1744.27	79.9325
1742.69	79.9155
1741.1	89.8858
1739.52	76.553
1737.93	96.5028
1736.34	83.1743
1734.75	86.4828
1733.17	81.476
1731.58	84.7835
1729.99	86.4274
1728.4	98.0409
1726.81	86.3905
1725.22	89.694
1723.63	88.0142
1722.04	91.3159
1720.45	94.6163
1718.86	89.6173
1717.27	81.302
1715.68	86.2612
1714.09	79.6087
1712.5	86.2243
1710.9	79.5746
1709.31	82.8724
1707.72	74.5692
1706.12	94.434
1704.53	89.4446
1702.94	82.8014
1701.34	84.4393
1699.75	77.7999
1698.15	94.3328
1696.56	92.6579
1694.96	87.6753
1693.36	84.3486
1691.77	81.0234
1690.17	76.0465
1688.57	77.683
1686.97	79.3187
1685.38	72.6932
1683.78	77.6329
1682.18	82.5704
1680.58	75.9484
1678.98	82.5348
1677.38	80.8667
1675.78	89.0992
1674.18	82.4815
1672.58	67.6203
1670.98	69.2546
1669.38	85.7253
1667.78	93.9479
1666.18	75.8012
1664.57	85.6699
1662.97	85.6514
1661.37	82.3393
1659.76	90.5537
1658.16	82.3038
1656.55	74.0574
1654.95	82.2682
1653.35	78.9604
1651.74	69.0755
1650.13	100.302
1648.53	82.1971
1646.92	78.8922
1645.32	83.8048
1643.71	73.9294
1642.1	90.3386
1640.49	68.9709
1638.89	73.8814
1637.28	83.7142
1635.67	75.4905
1634.06	75.4742
1632.45	80.379
1630.84	67.2413
1629.23	80.3441
1627.62	80.3267
1626.01	78.6703
1624.4	72.0988
1622.79	81.9127
1621.18	83.5328
1619.56	72.0519
1617.95	76.9478
1616.34	94.9363
1614.72	88.3697
1613.11	75.2616
1611.5	63.7949
1609.88	73.5934
1608.27	71.9424
1606.65	85.0043
1605.04	75.1798
1603.42	80.0654
1601.81	76.7807
1600.19	75.1307
1598.57	65.3168
1596.96	71.8329
1595.34	66.9206
1593.72	76.6972
1592.1	73.4175
1590.48	78.2949
1588.87	66.8623
1587.25	84.7825
1585.63	70.0933
1584.01	79.8564
1582.39	74.9508
1580.77	81.4505
1579.14	89.576
1577.52	74.9018
1575.9	74.8854
1574.28	74.8691
1572.66	78.1072
1571.04	71.5826
1569.41	94.3383
1567.79	65.0467
1566.16	58.5292
1564.54	69.8946
1562.92	84.5052
1561.29	77.9877
1559.67	76.3463
1558.04	82.8257
1556.41	87.6786
1554.79	74.6729
1553.16	68.1646
1551.54	79.508
1549.91	84.3573
1548.28	79.4732
1546.65	77.8342
1545.02	69.7112
1543.39	68.0751
1541.77	79.4035
1540.13	84.2465
1538.51	72.8896
1536.88	76.1124
1535.24	64.7623
1533.61	74.4603
1531.98	80.9174
1530.35	74.4276
1528.72	79.2642
1527.09	61.4567
1525.45	82.4632
1523.82	72.7457
1522.19	80.8108
1520.55	74.3296
1518.92	79.1598
1517.29	67.8363
1515.65	72.6658
1514.02	88.7942
1512.38	83.9324
1510.74	72.6178
1509.11	70.9884
1507.47	80.6509
1505.83	61.2812
1504.2	75.7785
1502.56	88.6574
1500.92	82.1915
1499.28	75.7284
1497.64	74.1008
1496	78.9161
1494.36	77.2885
1492.72	75.6616
1491.08	77.2544
1489.44	72.41
1487.8	78.8291
1486.16	67.5529
1484.52	82.0104
1482.88	88.423
1481.23	77.1522
1479.59	91.5979
1477.95	78.7247
1476.3	80.3136
1474.66	80.2958
1473.02	81.8836
1471.37	83.4707
1469.73	77.0329
1468.08	78.6203
1466.44	86.6237
1464.79	86.6045
1463.14	76.9647
1461.5	68.9323
1459.85	83.3416
1458.2	86.5278
1456.55	75.2946
1454.9	73.6763
1453.26	84.8691
1451.61	88.0522
1449.96	75.2279
1448.31	91.2136
1446.66	84.7939
1445.01	91.1732
1443.36	84.7562
1441.71	81.5398
1440.05	86.3171
1438.4	79.9055
1436.75	94.2676
1435.1	89.4545
1433.44	89.4346
1431.79	100.592
1430.14	92.5876
1428.48	82.9911
1426.83	90.9508
1425.17	87.7401
1423.52	86.1256
1421.86	92.4848
1420.21	86.0874
1418.55	82.8805
1416.89	71.7076
1415.24	97.182
1413.58	87.6036
1411.92	81.2143
1410.26	87.5646
1408.6	92.3203
1406.95	87.5256
1405.29	90.6882
1403.63	85.896
1401.97	84.2865
1400.31	89.0376
1398.64	73.1218
1396.98	88.998
1395.32	81.0337
1393.66	84.1927
1392	76.233
1390.34	80.9795
1388.67	82.5489
1387.01	79.3562
1385.35	85.6856
1383.68	76.148
1382.02	82.4752
1380.35	91.9711
1378.69	72.9263
1377.02	99.855
1375.36	96.6634
1373.69	90.3047
1372.02	88.7005
1370.36	80.7628
1368.69	90.2441
1367.02	106.053
1365.35	106.029
1363.68	102.841
1362.01	98.0725
1360.34	109.121
1358.67	115.421
1357	110.653
1355.33	135.914
1353.66	139.044
1351.99	156.39
1350.32	194.259
1348.65	238.427
1346.98	303.097
1345.3	369.317
1343.63	416.572
1341.96	525.331
1340.28	741.292
1338.61	1185.8
1336.93	2640.66
1335.26	8284.28
1333.58	18214.7
1331.91	23315.1
1330.23	13282.8
1328.56	4821.87
1326.88	2030.96
1325.2	1114.42
1323.52	756.942
1321.85	563.252
1320.17	404.255
1318.49	353.84
1316.81	294.015
1315.13	227.928
1313.45	224.734
1311.77	166.548
1310.09	152.373
1308.41	136.634
1306.73	102.06
1305.04	114.595
1303.36	116.139
1301.68	109.837
1300	94.1244
1298.31	92.5349
1296.63	83.1059
1294.95	86.2225
1293.26	86.2031
1291.58	75.2149
1289.89	70.4981
1288.21	64.2171
1286.52	72.0322
1284.84	73.5816
1283.15	71.9998
1281.46	84.5025
1279.77	67.2738
1278.09	65.6945
1276.4	64.1159
1274.71	65.6649
1273.02	68.7763
1271.33	57.8216
1269.64	60.9333
1267.95	62.4816
1266.26	64.0292
1264.57	54.6467
1262.88	60.8783
1261.19	49.9402
1259.5	53.0495
1257.8	57.7173
1256.11	57.7043
1254.42	51.4543
1252.72	49.8838
1251.03	59.2237
1249.34	54.5358
1247.64	59.1969
1245.95	62.2985
1244.25	46.7133
1242.55	59.1568
1240.86	68.4819
1239.16	59.1301
1237.46	45.1154
1235.77	45.1052
1234.07	52.8699
1232.37	49.7487
1230.67	49.7374
1228.97	55.942
1227.27	46.6077
1225.57	51.2569
1223.88	51.2453
1222.17	62.1015
1220.47	54.3265
1218.77	43.4513
1217.07	52.7504
1215.37	52.7384
1213.67	51.1757
1211.96	44.9624
1210.26	37.2018
1208.56	51.1409
1206.85	51.1293
1205.15	44.9216
1203.44	41.8141
1201.74	37.1597
1200.03	47.987
1198.33	46.4285
1196.62	35.5871
1194.91	47.9544
1193.21	44.8504
1191.5	41.7478
1189.79	44.83
1188.08	40.1833
1186.38	44.8097
1184.67	46.3443
1182.96	40.1559
1181.25	43.235
1179.54	44.769
1177.83	44.7588
1176.12	35.4903
1174.4	32.3968
1172.69	43.1859
1170.98	44.7181
1169.27	43.1663
1167.56	41.6152
1165.84	38.5238
1164.13	40.0556
1162.41	38.5063
1160.7	33.8778
1158.99	40.0283
1157.27	41.5584
1155.55	41.5489
1153.84	38.4625
1152.12	36.9156
1150.41	55.3608
1148.69	39.9737
1146.97	41.5017
1145.25	39.9555
1143.54	43.0192
1141.82	35.3291
1140.1	35.3211
1138.38	44.5251
1136.66	42.98
1134.94	32.2276
1133.22	36.8232
1131.5	38.3487
1129.78	35.2728
1128.05	41.3977
1126.33	30.658
1124.61	38.3138
1122.88	41.3694
1121.16	30.637
1119.44	33.693
1117.71	24.4984
1115.99	38.2701
1114.26	35.2004
1112.54	35.1924
1110.81	35.1844
1109.09	35.1763
1107.36	30.5811
1105.63	38.2177
1103.91	33.6239
1102.18	35.1442
1100.45	38.1915
1098.72	35.1281
1096.99	39.701
1095.26	33.5855
1093.53	42.7354
1091.8	27.4665
1090.07	30.5113
1088.34	27.4539
1086.61	38.1217
1084.88	39.6375
1083.15	28.9592
1081.41	42.667
1079.68	28.946
1077.95	25.8931
1076.21	38.0694
1074.48	31.971
1072.75	39.574
1071.01	39.565
1069.28	27.3849
1067.54	36.5048
1065.8	33.4551
1064.07	30.4067
1062.33	34.9597
1060.59	31.9124
1058.86	34.9437
1057.12	27.341
1055.38	34.9277
1053.64	25.8102
1051.9	25.8043
1050.16	39.4563
1048.42	28.8269
1046.68	33.3708
1044.94	31.8467
1043.2	28.807
1041.46	27.2846
1039.71	34.8557
1037.97	27.2721
1036.23	27.2659
1034.49	25.7452
1032.74	25.7393
1031	31.7883
1029.25	27.2408
1027.51	33.2867
1025.77	30.2537
1024.02	22.6851
1022.27	27.2158
1020.53	40.8143
1018.78	37.7824
1017.03	36.2628
1015.29	31.7226
1013.54	42.2871
1011.79	31.708
1010.04	28.6816
1008.29	30.1843
1006.54	31.6862
1004.79	31.6789
1003.04	37.7043
1001.29	36.1878
999.537	36.1795
997.787	33.1569
996.033	25.6153
994.281	27.1159
992.529	33.134
990.775	40.6551
989.021	27.0972
987.268	34.6162
985.514	25.58
983.758	34.6003
982.004	27.0722
980.248	27.066
978.49	25.5565
976.734	33.0654
974.979	27.0473
973.221	33.0502
971.463	27.0349
969.705	27.0286
967.945	34.5286
966.188	30.018
964.428	37.5138
962.668	37.5052
960.908	31.4971
959.146	31.4898
957.387	29.9834
955.625	37.4706
953.863	28.4711
952.102	34.4571
950.338	29.9557
948.576	40.4309
946.812	43.4158
945.049	28.4383
943.283	25.4389
941.52	31.4173
939.754	31.41
937.988	26.9167
936.223	26.9104
934.457	25.4096
932.689	32.8754
930.922	37.3497
929.156	31.3665
927.387	29.866
925.619	37.3239
923.85	37.3152
922.082	34.3221
920.312	25.3626
918.541	28.3399
916.771	25.3509
915	26.836
913.23	29.8108
911.457	28.3138
909.686	31.2869
907.914	31.2797
906.141	28.2941
904.367	26.7988
902.594	32.7465
900.82	23.8101
899.045	23.8046
897.271	25.2865
895.496	22.3065
893.719	34.1954
891.943	35.6739
890.168	29.7213
888.391	28.2287
886.613	23.7661
884.836	28.2157
883.057	25.2398
881.279	34.14
879.5	28.1961
877.721	26.7059
875.939	31.1497
874.16	32.6254
872.379	35.5831
870.598	23.7166
868.816	45.9403
867.035	41.4848
865.252	35.5502
863.471	31.0992
861.688	23.6891
859.904	31.0848
858.119	26.6379
856.336	32.5499
854.551	29.584
852.766	36.9714
850.98	25.1347
849.193	28.0852
847.408	38.4235
845.621	36.9371
843.834	29.5428
842.045	29.536
840.258	31.0056
838.469	33.9506
836.68	30.9912
834.891	29.5086
833.102	32.4519
831.311	28.0201
829.521	23.5904
827.73	28.0071
825.938	29.4744
824.146	33.8876
822.354	20.6225
820.561	33.8719
818.768	27.9746
816.975	36.8002
815.182	25.0183
813.387	26.4838
811.592	33.8326
809.797	36.766
808.002	30.8763
806.205	24.9893
804.408	27.9227
802.611	33.7933
800.814	27.9097
799.018	27.9032
797.219	30.8333
795.42	27.8903
793.621	35.2216
791.822	36.6807
790.023	29.3377
788.223	29.3309
786.422	30.7903
784.621	32.249
782.82	35.1725
781.018	29.3036
779.215	26.3671
777.412	35.148
775.609	32.2115
773.807	38.0592
772.002	30.733
770.197	29.2627
768.393	29.2559
766.588	29.2491
764.783	30.7044
762.977	20.4648
761.17	32.1515
759.363	29.2219
757.557	32.1366
755.748	26.2874
753.939	29.2015
752.131	33.5739
750.322	29.1879
748.514	26.263
746.703	33.5504
744.893	18.9589
743.082	34.9928
741.271	34.9846
739.459	32.0618
737.648	24.7692
735.836	24.7635
734.023	39.321
732.209	32.0319
730.396	26.2018
728.582	32.017
726.768	23.2796
724.953	24.7288
723.137	26.1774
721.322	24.7173
719.506	23.2579
717.689	27.6124
715.871	27.6059
714.055	24.6943
712.236	29.0453
710.418	29.0385
708.6	31.9349
706.781	27.5737
704.961	31.92
703.141	21.7586
701.32	21.7535
699.5	24.6482
697.678	23.1929
695.857	20.289
694.035	23.1821
692.213	26.0737
690.389	28.964
688.566	27.5094
686.742	28.9505
684.918	26.0494
683.094	27.4901
681.268	20.2512
679.443	20.2464
677.617	24.5792
675.791	21.6825
673.963	26.0129
672.137	24.562
670.309	21.6673
668.48	24.5505
666.652	27.4324
664.824	18.7651
662.994	20.2039
661.164	25.9704
659.334	23.0794
657.504	24.5161
655.672	25.9521
653.84	27.3875
652.01	24.4989
650.176	30.2563
648.344	18.7257
646.51	28.802
644.678	34.5543
642.844	23.0308
641.008	28.7818
639.174	23.0201
637.338	20.1378
635.502	24.4474
633.666	25.8794
631.83	20.1237
629.992	28.7414
628.154	24.4245
626.316	24.4188
624.479	22.977
622.641	25.8431
620.801	22.9662
618.961	24.3959
617.121	24.3902
615.279	21.5157
613.439	18.6426
611.598	18.6382
609.756	15.7671
607.914	15.7634
606.07	24.3559
604.229	17.1884
602.385	15.7523
600.541	22.9071
598.695	20.039
596.852	20.0343
595.006	21.4603
593.16	22.8857
591.314	22.8803
589.467	21.4452
587.621	28.587
585.773	25.7222
583.926	21.4302
582.076	12.8551
580.229	17.1361
578.379	14.2767
576.529	17.1281
574.68	31.3941
572.83	18.5467
570.979	14.2633
569.127	21.39
567.275	18.5336
565.424	15.6786
563.57	21.3749
561.717	24.2192
559.863	22.7892
558.01	21.3599
556.156	19.9312
554.301	18.5032
552.445	15.6529
550.59	24.1852
548.734	21.3348
546.877	17.0639
545.02	24.1681
543.162	19.8985
541.305	22.7358
539.447	15.6272
537.588	21.3048
535.729	19.8798
533.869	19.8751
532.01	18.4512
530.148	12.7709
528.287	28.3731
526.426	18.4382
524.564	18.4338
522.701	12.7589
520.84	18.4252
518.977	19.8378
517.113	21.2498
515.248	21.2448
513.385	19.8238
511.52	15.5722
509.654	16.9839
507.789	25.4698
505.922	18.3906
504.055	14.1433
502.189	21.2099
500.32	16.9639
498.453	18.3733
496.584	19.7819
494.717	14.1266
492.848	15.5356
490.977	16.944
489.107	15.5283
487.236	14.1133
485.365	15.521
483.494	21.1601
481.621	16.9241
479.75	19.7401
477.877	18.3258
476.004	15.5028
474.131	9.86308
472.256	18.3128
470.381	18.3085
468.506	15.4882
466.631	14.0769
464.756	19.703
462.879	15.4773
461.002	11.2535
459.125	19.6891
457.248	21.0904
455.369	14.057
453.49	16.8644
451.611	15.4554
449.732	11.2376
447.852	11.235
445.973	14.0404
444.092	16.8446
442.211	15.4372
440.328	12.6275
438.447	12.6245
436.564	22.4383
434.682	22.433
432.799	16.8208
430.914	15.4154
429.029	15.4118
427.145	9.80518
425.26	14.0041
423.375	14.0008
421.488	13.9975
419.602	13.9942
417.715	12.5918
415.828	9.79132
