# Supplementary material for: Synthesis and characterization of diamonds using C3H5N3O as an organic additive under high pressure and high temperature
Source: Royal Society of Chemistry journal article supplement (doi:10.1039/c8ce00912k), 2018-01-01
Supplement: c8ce00912k3.xlsx [file c8ce00912k3.xlsx]

## Sheet: raman data.excel
#Wave	#Intensity
2124.48	22.7679
2122.97	19.2651
2121.46	17.5103
2119.96	12.2548
2118.45	22.7544
2116.94	10.5
2115.43	24.495
2113.92	12.2451
2112.41	19.2385
2110.9	24.4805
2109.39	26.2239
2107.88	19.2271
2106.37	15.7281
2104.86	24.4611
2103.35	19.2156
2101.84	17.4653
2100.32	20.9542
2098.81	17.4583
2097.3	19.2004
2095.79	13.9611
2094.27	20.9375
2092.76	17.4445
2091.25	15.6969
2089.73	20.925
2088.22	26.1511
2086.7	20.9167
2085.19	22.6552
2083.67	20.9083
2082.16	27.8722
2080.64	19.1583
2079.12	24.3785
2077.61	26.1146
2076.09	10.4437
2074.58	15.6625
2073.06	17.3993
2071.54	19.1354
2070.02	20.8708
2068.5	22.6055
2066.99	19.1239
2065.47	20.8582
2063.95	22.5919
2062.43	15.6374
2060.91	20.8457
2059.39	17.3679
2057.87	13.8916
2056.35	24.3054
2054.83	22.5647
2053.31	19.0894
2051.79	20.8206
2050.26	17.347
2048.74	15.6092
2047.22	13.872
2045.7	22.5375
2044.17	13.8665
2042.65	25.9944
2041.12	19.0587
2039.6	13.8581
2038.08	12.1234
2036.55	25.9734
2035.03	19.0433
2033.5	27.6938
2031.98	25.9577
2030.45	12.1112
2028.92	24.2174
2027.4	22.4831
2025.87	17.2912
2024.34	24.2027
2022.82	17.2842
2021.29	19.0087
2019.76	22.4603
2018.23	20.7284
2016.7	22.4512
2015.17	20.72
2013.64	25.8948
2012.12	29.3415
2010.59	22.4331
2009.05	27.6043
2007.53	17.2492
2005.99	18.9703
2004.46	22.4148
2002.93	22.4103
2001.4	25.8528
1999.87	17.2317
1998.34	18.951
1996.8	17.2247
1995.27	13.7769
1993.74	18.9394
1992.2	15.4927
1990.67	25.816
1989.13	13.7657
1987.6	13.7629
1986.06	18.9202
1984.53	20.636
1982.99	17.1931
1981.46	27.5034
1979.92	15.4675
1978.39	17.1826
1976.85	18.897
1975.31	18.8931
1973.78	22.3237
1972.24	15.4517
1970.7	13.732
1969.16	17.1615
1967.62	18.8738
1966.08	12.0082
1964.54	17.151
1963	22.2917
1961.46	15.4296
1959.92	17.1405
1958.38	17.1369
1956.84	10.2801
1955.3	18.8429
1953.76	18.839
1952.22	17.1229
1950.68	13.6955
1949.13	10.2695
1947.59	11.9786
1946.05	10.2653
1944.5	20.5264
1942.96	20.5221
1941.42	17.0983
1939.87	20.5137
1938.33	18.8003
1936.78	22.214
1935.24	15.3758
1933.69	20.4968
1932.15	15.3694
1930.6	10.2442
1929.05	22.1911
1927.51	20.4799
1925.96	18.7694
1924.41	13.6476
1922.86	11.9392
1921.32	25.5787
1919.77	17.049
1918.22	23.8636
1916.67	13.6335
1915.12	17.0384
1913.57	20.4418
1912.02	20.4376
1910.47	20.4334
1908.92	15.3219
1907.37	27.2332
1905.82	13.6138
1904.27	18.7151
1902.71	18.7112
1901.16	15.306
1899.61	22.1041
1898.05	16.9996
1896.5	23.7945
1894.95	25.4888
1893.39	16.989
1891.84	23.7797
1890.29	15.2838
1888.73	16.9784
1887.18	11.8824
1885.62	20.3656
1884.06	16.9678
1882.51	23.75
1880.95	16.9608
1879.39	18.653
1877.84	15.2583
1876.28	13.5601
1874.72	13.5573
1873.16	18.6374
1871.61	15.2456
1870.05	10.1616
1868.49	16.9325
1866.93	18.6219
1865.37	22.0031
1863.81	20.3063
1862.25	20.302
1860.69	15.2234
1859.12	11.8379
1857.56	28.7432
1856	28.7372
1854.44	18.5908
1852.88	15.2074
1851.31	18.583
1849.75	18.5791
1848.19	18.5752
1846.62	15.1947
1845.06	16.8795
1843.5	13.5007
1841.93	23.6213
1840.37	20.2426
1838.8	16.8653
1837.24	23.6065
1835.67	21.9157
1834.1	18.5402
1832.54	20.2214
1830.97	11.7933
1829.4	20.2129
1827.83	15.1565
1826.27	26.9392
1824.7	20.2001
1823.13	20.1959
1821.56	13.4611
1819.99	15.1405
1818.42	16.8193
1816.85	20.1789
1815.28	16.8122
1813.71	16.8087
1812.14	21.8467
1810.57	20.1619
1809	15.1182
1807.43	20.1534
1805.85	13.4328
1804.28	16.7874
1802.71	18.4622
1801.13	20.1364
1799.56	15.0991
1797.99	23.4825
1796.41	15.0927
1794.84	11.7363
1793.26	15.0863
1791.69	13.4072
1790.11	15.08
1788.54	10.0512
1786.96	16.7484
1785.38	13.3959
1783.81	11.7189
1782.23	16.7378
1780.65	15.0608
1779.07	11.7115
1777.5	25.0907
1775.92	18.3959
1774.34	15.048
1772.76	13.3732
1771.18	16.7129
1769.6	11.6966
1768.02	15.0353
1766.44	16.7023
1764.86	16.6988
1763.28	13.3562
1761.69	15.0225
1760.11	16.6881
1758.53	16.6846
1756.95	16.681
1755.36	15.0097
1753.78	13.3391
1752.2	18.3374
1750.61	16.6668
1749.03	13.3306
1747.44	13.3278
1745.86	11.6593
1744.27	26.6442
1742.69	19.9789
1741.1	18.3101
1739.52	16.642
1737.93	21.6299
1736.34	24.9523
1734.75	26.6101
1733.17	19.9533
1731.58	13.2994
1729.99	14.9586
1728.4	18.2788
1726.81	21.5976
1725.22	18.271
1723.63	16.6065
1722.04	16.6029
1720.45	21.5792
1718.86	16.5958
1717.27	18.2515
1715.68	13.271
1714.09	21.5607
1712.5	18.2397
1710.9	26.5249
1709.31	11.6021
1707.72	18.228
1706.12	21.5376
1704.53	13.2511
1702.94	13.2482
1701.34	16.5567
1699.75	9.9319
1698.15	16.5496
1696.56	19.8553
1694.96	23.1595
1693.36	21.5006
1691.77	18.1889
1690.17	19.8382
1688.57	18.1811
1686.97	8.26237
1685.38	18.1733
1683.78	18.1694
1682.18	18.1655
1680.58	14.8595
1678.98	14.8563
1677.38	9.90205
1675.78	16.4999
1674.18	18.1459
1672.58	14.8435
1670.98	19.787
1669.38	18.1342
1667.78	13.1857
1666.18	18.1264
1664.57	13.18
1662.97	19.7657
1661.37	16.4679
1659.76	13.1715
1658.16	8.23038
1656.55	14.8115
1654.95	13.1629
1653.35	16.4501
1651.74	16.4465
1650.13	18.0873
1648.53	14.7955
1646.92	11.5051
1645.32	23.0052
1643.71	21.3574
1642.1	22.9953
1640.49	14.7795
1638.89	16.4181
1637.28	19.6974
1635.67	18.0521
1634.06	13.1259
1632.45	16.4039
1630.84	16.4003
1629.23	14.7571
1627.62	19.6718
1626.01	21.3065
1624.4	11.4703
1622.79	26.2121
1621.18	21.2927
1619.56	14.7379
1617.95	11.4603
1616.34	11.4578
1614.72	11.4553
1613.11	14.7251
1611.5	21.265
1609.88	17.9895
1608.27	16.3505
1606.65	11.4429
1605.04	13.0747
1603.42	16.3399
1601.81	17.97
1600.19	19.5993
1598.57	17.9621
1596.96	16.3257
1595.34	14.6899
1593.72	17.9504
1592.1	22.841
1590.48	19.5737
1588.87	21.2002
1587.25	14.6739
1585.63	17.9308
1584.01	16.2972
1582.39	14.6643
1580.77	13.0321
1579.14	16.2866
1577.52	21.1679
1575.9	17.9074
1574.28	9.76553
1572.66	13.0179
1571.04	13.015
1569.41	14.6387
1567.79	13.0093
1566.16	13.0065
1564.54	21.1309
1562.92	16.251
1561.29	12.998
1559.67	12.9951
1558.04	11.3682
1556.41	16.2368
1554.79	14.6099
1553.16	25.9675
1551.54	16.2261
1549.91	17.8448
1548.28	24.3285
1546.65	14.5939
1545.02	14.5907
1543.39	24.3125
1541.77	16.2048
1540.13	16.2012
1538.51	19.4372
1536.88	19.433
1535.24	17.8096
1533.61	14.5683
1531.98	19.4202
1530.35	17.7979
1528.72	11.3235
1527.09	11.321
1525.45	12.9354
1523.82	21.0154
1522.19	17.7784
1520.55	16.1586
1518.92	11.3085
1517.29	16.1515
1515.65	22.6071
1514.02	14.53
1512.38	17.7549
1510.74	12.9098
1509.11	17.7471
1507.47	14.5172
1505.83	12.9013
1504.2	16.1231
1502.56	17.7315
1500.92	16.116
1499.28	17.7237
1497.64	16.1089
1496	17.7159
1494.36	17.7119
1492.72	16.0982
1491.08	16.0947
1489.44	19.3093
1487.8	24.1314
1486.16	16.084
1484.52	12.8644
1482.88	12.8615
1481.23	19.288
1479.59	17.6768
1477.95	14.4596
1476.3	14.4564
1474.66	16.0592
1473.02	22.4779
1471.37	20.8677
1469.73	16.0485
1468.08	22.463
1466.44	9.62485
1464.79	17.6417
1463.14	12.8275
1461.5	17.6338
1459.85	16.0272
1458.2	14.4213
1456.55	8.01006
1454.9	19.2199
1453.26	16.013
1451.61	17.6104
1449.96	12.8047
1448.31	16.0024
1446.66	23.9983
1445.01	22.3934
1443.36	23.9876
1441.71	22.3835
1440.05	20.78
1438.4	17.5792
1436.75	15.9776
1435.1	19.1688
1433.44	14.3734
1431.79	17.5636
1430.14	12.7707
1428.48	14.3638
1426.83	20.7432
1425.17	14.3575
1423.52	20.734
1421.86	12.7565
1420.21	22.3189
1418.55	19.1263
1416.89	22.309
1415.24	20.7109
1413.58	25.4847
1411.92	19.1093
1410.26	17.5129
1408.6	20.6925
1406.95	19.0965
1405.29	12.7282
1403.63	22.2693
1401.97	14.3128
1400.31	14.3096
1398.64	25.4337
1396.98	28.6065
1395.32	25.4223
1393.66	20.651
1392	15.8819
1390.34	20.6418
1388.67	15.8748
1387.01	17.4584
1385.35	20.628
1383.68	15.8642
1382.02	25.377
1380.35	22.1999
1378.69	20.6096
1377.02	20.605
1375.36	23.7697
1373.69	30.1016
1372.02	33.2627
1370.36	31.6717
1368.69	26.9149
1367.02	30.0747
1365.35	34.8155
1363.68	39.5542
1362.01	33.2181
1360.34	39.5365
1358.67	52.1765
1357	64.8109
1355.33	71.118
1353.66	71.1021
1351.99	74.2456
1350.32	86.8636
1348.65	132.635
1346.98	168.914
1345.3	222.537
1343.63	274.559
1341.96	302.894
1340.28	501.555
1338.61	782.125
1336.93	1625.38
1335.26	4760
1333.58	10479.1
1331.91	13741.1
1330.23	9286.77
1328.56	3916.39
1326.88	1725.53
1325.2	906.645
1323.52	585.41
1321.85	399.626
1320.17	314.595
1318.49	248.475
1316.81	199.678
1315.13	169.767
1313.45	149.299
1311.77	116.27
1310.09	98.9641
1308.41	91.0893
1306.73	67.5166
1305.04	53.3732
1303.36	54.9306
1301.68	45.5037
1300	48.631
1298.31	42.3465
1296.63	37.6328
1294.95	37.6244
1293.26	47.0199
1291.58	29.7726
1289.89	32.8991
1288.21	25.0603
1286.52	32.8843
1284.84	31.3113
1283.15	31.3043
1281.46	23.4729
1279.77	25.0321
1278.09	32.8473
1276.4	17.2018
1274.71	23.4518
1273.02	23.4465
1271.33	25.0039
1269.64	18.7487
1267.95	26.5547
1266.26	26.5487
1264.57	20.2974
1262.88	21.8538
1261.19	29.652
1259.5	17.1631
1257.8	20.279
1256.11	14.0362
1254.42	21.8291
1252.72	18.7064
1251.03	21.8193
1249.34	28.047
1247.64	23.3672
1245.95	24.9194
1244.25	20.2424
1242.55	20.2379
1240.86	23.3461
1239.16	15.5605
1237.46	17.1127
1235.77	21.7749
1234.07	18.66
1232.37	18.6558
1230.67	18.6515
1228.97	24.8631
1227.27	17.0895
1225.57	17.0856
1223.88	20.1875
1222.17	18.6304
1220.47	12.4175
1218.77	15.5183
1217.07	15.5148
1215.37	17.0624
1213.67	21.7109
1211.96	20.1556
1210.26	20.151
1208.56	17.047
1206.85	15.4937
1205.15	24.7844
1203.44	23.2301
1201.74	15.4832
1200.03	18.5756
1198.33	12.3809
1196.62	23.209
1194.91	18.563
1193.21	13.9191
1191.5	15.4621
1189.79	17.0045
1188.08	17.0006
1186.38	15.4516
1184.67	9.26886
1182.96	12.3557
1181.25	16.9852
1179.54	18.5251
1177.83	16.9775
1176.12	15.4306
1174.4	12.3416
1172.69	13.8812
1170.98	12.336
1169.27	10.7916
1167.56	7.70651
1165.84	9.24571
1164.13	10.7842
1162.41	6.16101
1160.7	12.3192
1158.99	10.7769
1157.27	13.8528
1155.55	7.69425
1153.84	18.462
1152.12	18.4578
1150.41	15.378
1148.69	15.3745
1146.97	9.22259
1145.25	13.8307
1143.54	10.7548
1141.82	10.7523
1140.1	12.2856
1138.38	10.7474
1136.66	15.35
1134.94	10.7425
1133.22	12.2744
1131.5	9.2037
1129.78	7.668
1128.05	9.1995
1126.33	12.2632
1124.61	9.1953
1122.88	15.322
1121.16	16.8504
1119.44	7.65751
1117.71	10.7181
1115.99	6.12321
1114.26	6.12181
1112.54	13.7709
1110.81	12.238
1109.09	12.2352
1107.36	9.17434
1105.63	7.64353
1103.91	16.8119
1102.18	7.64004
1100.45	7.6383
1098.72	10.6912
1096.99	6.10785
1095.26	16.7927
1093.53	18.3152
1091.8	10.6814
1090.07	12.2045
1088.34	10.6765
1086.61	6.09947
1084.88	12.1962
1083.15	19.8142
1081.41	12.1906
1079.68	9.14084
1077.95	10.6619
1076.21	9.13665
1074.48	10.657
1072.75	13.6987
1071.01	10.6521
1069.28	13.6924
1067.54	12.1683
1065.8	10.6448
1064.07	7.60168
1062.33	9.11993
1060.59	4.55892
1058.86	16.7122
1057.12	13.6705
1055.38	10.6302
1053.64	13.6642
1051.9	10.6253
1050.16	9.10531
1048.42	6.06881
1046.68	10.618
1044.94	10.6156
1043.2	13.6454
1041.46	15.1581
1039.71	13.6392
1037.97	9.0907
1036.23	12.1182
1034.49	10.601
1032.74	12.1126
1031	10.5961
1029.25	18.1606
1027.51	7.56516
1025.77	12.1015
1024.02	7.56169
1022.27	16.6319
1020.53	4.53493
1018.78	12.0904
1017.03	13.5985
1015.29	13.5954
1013.54	10.5718
1011.79	12.0793
1010.04	6.03824
1008.29	9.05528
1006.54	10.5621
1004.79	6.03408
1003.04	15.0817
1001.29	13.5704
999.537	4.52244
997.787	7.53566
996.033	7.53393
994.281	7.53219
992.529	9.03655
990.775	9.03447
989.021	13.5486
987.268	15.0505
985.514	12.0376
983.758	12.0349
982.004	12.0321
980.248	7.51834
978.49	6.01328
976.734	10.5208
974.979	10.5184
973.221	9.0137
971.463	9.01162
969.705	9.00954
967.945	4.50373
966.188	13.5081
964.428	15.0055
962.668	15.0021
960.908	10.499
959.146	10.4966
957.387	14.9917
955.625	4.49647
953.863	11.9878
952.102	11.9851
950.338	10.4845
948.576	8.98465
946.812	14.971
945.049	10.4773
943.283	7.48203
941.52	13.4645
939.754	10.47
937.988	16.4491
936.223	8.97015
934.457	16.4415
932.689	7.47167
930.922	4.48197
929.156	7.46822
927.387	10.4531
925.619	7.46477
923.85	11.9409
922.082	5.96906
920.312	13.4273
918.541	13.4242
916.771	10.4386
915	8.94532
913.23	10.4338
911.457	17.8824
909.686	7.44926
907.914	8.93705
906.141	13.4025
904.367	13.3994
902.594	10.4193
900.82	11.9051
899.045	7.43894
897.271	14.8744
895.496	10.4097
893.719	10.4073
891.943	17.8369
890.168	17.8328
888.391	11.8858
886.613	16.3392
884.836	13.3653
883.057	10.3928
881.279	16.3278
879.5	10.388
877.721	23.7386
875.939	16.3165
874.16	20.7616
872.379	14.8263
870.598	16.3052
868.816	19.2653
867.035	20.7424
865.252	14.8126
863.471	11.8473
861.688	22.2086
859.904	11.8418
858.119	23.6782
856.336	25.1522
854.551	17.7504
852.766	22.1828
850.98	13.3066
849.193	17.738
847.408	20.6896
845.621	11.8199
843.834	16.2486
842.045	20.6752
840.258	22.1469
838.469	22.1417
836.68	14.7577
834.891	11.8034
833.102	17.701
831.311	19.1717
829.521	20.6416
827.73	16.2147
825.938	20.6321
824.146	10.3136
822.354	14.7303
820.561	11.7815
818.768	16.1958
816.975	19.1361
815.182	8.83
813.387	11.7706
811.592	16.1808
809.797	13.2358
808.002	11.7624
806.205	20.5794
804.408	19.105
802.611	11.7542
800.814	23.5029
799.018	23.4975
797.219	24.9603
795.42	22.0186
793.621	16.1432
791.822	22.0084
790.023	16.1357
788.223	19.0651
786.422	11.7296
784.621	8.79517
782.82	19.0518
781.018	16.117
779.215	19.0429
777.412	13.1805
775.609	19.0341
773.807	20.4934
772.002	17.5617
770.197	20.4839
768.393	20.4791
766.588	23.3993
764.783	21.9317
762.977	14.6177
761.17	11.6915
759.363	17.5331
757.557	14.6075
755.748	18.9854
753.939	14.6007
752.131	5.83893
750.322	13.1345
748.514	18.9677
746.703	17.5046
744.893	14.5837
743.082	17.4964
741.271	13.1192
739.459	14.5735
737.648	11.6561
735.836	18.9368
734.023	13.107
732.209	13.104
730.396	13.1009
728.582	11.6425
726.768	17.4597
724.953	17.4557
723.137	8.72579
721.322	18.9015
719.506	15.9898
717.689	13.0795
715.871	17.4353
714.055	20.3365
712.236	15.9749
710.418	20.327
708.6	17.419
706.781	11.61
704.961	15.96
703.141	13.0551
701.32	13.0521
699.5	14.4989
697.678	10.1469
695.857	13.043
694.035	5.79551
692.213	15.9339
690.389	14.482
688.566	10.135
686.742	11.5802
684.918	15.9191
683.094	13.0216
681.268	14.4651
679.443	15.9079
677.617	14.4584
675.791	18.7915
673.963	11.5613
672.137	11.5586
670.309	7.22243
668.48	18.7739
666.652	11.5505
664.824	12.9913
662.994	8.65881
661.164	12.9852
659.334	12.9821
657.504	15.8634
655.672	10.0925
653.84	7.20724
652.01	14.4111
650.176	11.5262
648.344	11.5235
646.51	17.2812
644.678	11.5181
642.844	11.5154
641.008	18.7082
639.174	17.265
637.338	10.0689
635.502	12.9427
633.666	10.0642
631.83	12.9367
629.992	18.6819
628.154	14.3673
626.316	8.61839
624.479	12.9246
622.641	11.4858
620.801	11.4831
618.961	11.4804
617.121	11.4777
615.279	10.0407
613.439	10.0383
611.598	4.30113
609.756	7.16687
607.914	10.0313
606.07	11.4616
604.229	12.8913
602.385	15.7523
600.541	14.317
598.695	8.58816
596.852	10.0172
595.006	17.1683
593.16	5.72141
591.314	7.15009
589.467	7.14841
587.621	8.57609
585.773	10.0031
583.926	17.1441
582.076	11.4267
580.229	8.56805
578.379	11.4214
576.529	12.846
574.68	7.13502
572.83	14.2667
570.979	8.558
569.127	8.556
567.275	12.831
565.424	11.4026
563.57	14.25
561.717	5.69865
559.863	7.12164
558.01	11.3919
556.156	11.3893
554.301	7.11662
552.445	11.3839
550.59	11.3813
548.734	5.68929
546.877	9.95392
545.02	15.6382
543.162	8.52793
541.305	14.2099
539.447	9.94458
537.588	11.3626
535.729	5.67995
533.869	8.51792
532.01	8.51592
530.148	8.51392
528.287	8.51192
526.426	5.67328
524.564	8.50792
522.701	5.67061
520.84	14.1732
518.977	8.50192
517.113	5.66662
515.248	4.24896
513.385	8.49593
511.52	7.07828
509.654	8.49194
507.789	8.48994
505.922	11.3173
504.055	11.3146
502.189	8.48395
500.32	7.0683
498.453	2.82666
496.584	7.06498
494.717	5.65065
492.848	7.06166
490.977	5.64799
489.107	4.235
487.236	5.64534
485.365	11.288
483.494	9.87469
481.621	12.693
479.75	1.41001
477.877	9.86773
476.004	7.04672
474.131	4.22704
472.256	8.45208
470.381	7.04174
468.506	5.63207
466.631	1.40769
464.756	5.62942
462.879	4.22107
461.002	8.44015
459.125	12.6572
457.248	7.03015
455.369	4.2171
453.49	9.83757
451.611	9.83526
449.732	5.61882
447.852	7.02187
445.973	11.2324
444.092	5.61486
442.211	7.01692
440.328	4.20916
438.447	4.20817
436.564	5.60957
434.682	5.60824
432.799	4.20519
430.914	0
429.029	8.40642
427.145	2.80148
425.26	7.00205
423.375	7.0004
421.488	4.19925
419.602	4.19826
417.715	2.79818
415.828	8.39256
